# Supplementary material
Source: publisher figshare collection journal article supplement (https://geolsoc.figshare.com/ndownloader/files/5425601)
Supplement: Supplementary file 1 [file 5425601]

Supplementary Table 3. Analyses of samples not given in Tables 1�6, but which appear in the text or on figures.
Sample	Formation	Unit name	N	SiO2	TiO2	Al2O3	Fe2O3	MnO	MgO	CaO	Na2O	K2O	F	Cl	H2O	Total	Ba	Mn	Nb	Rb	Sr	Y	Zn	Zr
228- 3	Shungura	Tuff J-4A	15	70.76	0.21	12.42	3.2	0.11	0	0.38	3.52	3.82	0.23	0.11	6.6	101.25	230	790	140	65	<5	105	185	1160
228-7	Shungura	Tuff J-6A	13	72.22	0.39	9.48	5.87	0.28	0.16	0.22	3.36	3.35	0.3	0.2	5.22	100.87	40	2110	240	145	<5	125	290	1580
77-12	Koobi Fora	KBS															30	920	200	175	<5	135	245	1290
ETH85-041	Shungura	Tuff H-3B															50	2550	100	85	10	95	215	860
ETH85-042	Shungura	Tuff H-4															65	2030	130	95	<5	80	185	930
ETH85-047	Shungura	~J-3	43	69.96	0.15	10.25	2.74	0.08	0.01	0.17	4.33	3.42	na	na	na	91.11	25	600	180	125	10	115	210	1430
ETH85-048	Shungura	Tuff J-4	11	70.11	0.11	12.13	2.76	0.09	0	0.3	2.6	3.34	0.24	0.14	8.42	100.12	200	640	155	75	10	115	200	1050
ETH85-059	Shungura	Chari=L															220	460	100	105	10	100	195	1070
ETH86-279	Shungura	KBS=H-2															<25	840	190	160	<5	130	225	1230
ETH86-284	Shungura	Malbe=H-4															35	1910	145	105	10	90	190	1030
ETH86-296	Shungura	Tuff J-2	17	70.37	0.36	9.97	5.12	0.28	0.16	0.2	1.51	2.51	na	0.15	8.45	99.06	<25	2100	205	127	5	115	245	1405
ETH86-307	Shungura	J-6D	6	70.69	0.38	8.56	7.17	0.29	0	0.28	0.84	1.54	0.24	0.13	9.11	99.09	560	1660	125	80	95	85	170	830
ETH86-316	Shungura	Tuff J-4B	13	71.12	0.15	12.47	3.22	0.12	0	0.39	2.83	3.69	0.23	0.12	6.84	101.06	310	930	135	65	20	105	180	1120
ETH86-317	Shungura	Tuff J-4C															285	910	150	70	15	110	195	1190
F-104	Shungura	Tuff H-3A															<25	1050	255	175	<5	145	260	1830
IL02-050	Koobi Fora	L. Ileret		73.53	0.23	9.2	5.82	0.25	0.04	0.13	2.09	1.4	na	0.26	na	92.95
IL02-060 M1	Koobi Fora	L. Koobi Fora	6	74.23	0.3	9.42	5.46	0.21	0.01	0.24	2.28	3.12	0.41	0.08	3.68	99.43
IL02-060 M2	Koobi Fora	L. Koobi Fora	3	75.49	0.18	9.87	4.57	0.15	0.02	0.14	2.69	3.56	0.45	0.18	1.93	98.99
K00-6159	Koobi Fora	Unnamed	4	74.16	0.19	9.63	5	0.14	0.02	0.14	3.1	2.55	na	0.22	na	94.53
K00-6160	Koobi Fora	Unnamed	6	74.11	0.2	9.71	4.9	0.14	0.02	0.16	2.65	2.34	na	0.19	na	93.8
K00-6162	Koobi Fora	U. Okote=Ka	7	73.53	0.35	10.04	5.35	0.24	0.13	0.21	3.07	2.89	na	0.16	na	95.33
K02- 05	Koobi Fora	Etirr	14	72.75	0.36	8.66	6.6	0.3	0.07	0.19	1.84	1.3	0.58	0.29	7.09	99.72
K02- 07	Koobi Fora	L. Koobi Fora	14	73.93	0.3	9.43	5.27	0.2	0	0.23	2.49	1.46	0.46	0.08	6.73	100.37
K80- 134	Koobi Fora	KBS (=H-2)															<25	890	205	175	<5	135	255	1280
K80- 215	Koobi Fora	Orange															50	460	80	140	30	65	105	550
K80- 430	Koobi Fora	U. Okote=Ka															<25	1850	245	120	<5	125	270	1580
K82- 768	Nachukui	Nabelete	17	74.83	0.17	10.69	3.07	0.09	0.01	0.18	4.05	4.27	0.17	0.12	3.96	101.51	175	780	120	100	<5	115	225	1210
K82- 775	Nachukui	KBS
K82- 784	Nachukui	Etirr															<25	2590	315	145	<5	155	320	1960
K82- 786	Nachukui	Chari=L															225	700	100	105	6	100	195	1075
Supplementary Table 3 continued.
Sample	Formation	Unit name	N	SiO2	TiO2	Al2O3	Fe2O3	MnO	MgO	CaO	Na2O	K2O	F	Cl	H2O	Total	Ba	Mn	Nb	Rb	Sr	Y	Zn	Zr
K82- 828	Koobi Fora	U. Okote=Ka															<25	1840	235	125	<5	120	310	1560
K83-1575	Koobi Fora	Unnamed	8	71.91	0.21	9.24	4.88	0.15	0.01	0.18	3.01	2.55	0.37	0.17	5.63	98.11	<25	1070	165	155	<5	130	255	1580
K83-1643	Koobi Fora	BlkPum =J-7															765	1020	85	80	108	65	100	730
K83-1645 M1	Koobi Fora	Unnamed	10	73.53	0.3	9.64	5.03	0.21	0	0.23	3.42	3.97	0.17	0.08	5.75	102.23
K83-1645 M2	Koobi Fora	Unnamed	6	72.79	0.34	11.34	3.26	0.16	0.09	0.36	3.77	4.41	0.11	0.09	4.91	101.58
K83-1645 M3	Koobi Fora	Unnamed	4	73.71	0.18	10.22	3.96	0.11	0.02	0.19	3.31	3.93	0.18	0.1	6.28	102.08
K83-1662	Koobi Fora	Unnamed
K83-1681	Koobi Fora	Ileret
K84-1804	Koobi Fora	U. Okote=Ka															60	1760	225	140	<5	120	250	1470
K84-1805	Koobi Fora	U. Okote=Ka
K84-1806 M1	Koobi Fora	Unnamed	10	71.34	0.47	14.2	2.71	0.14	0.36	1.08	3.15	3.59	0.18	0.09	5.58	102.8	175	1460	135	110	40	95	180	1040
K84-1806 M2	Koobi Fora	Unnamed	10	74.78	0.3	9.58	5.29	0.21	0.01	0.22	2.11	2.63	0.33	0.1	6.76	102.14
K84-1840	Nachukui	Unnamed															<25	2990	285	60	<5	120	285	1400
K84-1841	Nachukui	Unnamed	10	70.94	0.41	8.2	6.26	0.34	0.08	0.18	1.19	1.64	0	0.28	8.37	97.82	168	2690	265	145	40	135	305	1690
K84-2911	Nachukui	Lokapetamoi															240	480	85	110	55	75	90	630
K84-2964	Nachukui	L. Koobi Fora															95	1430	140	90	<5	110	225	1110
K84-2977	Nachukui	Chari=L															215	730	105	110	5	105	205	1120
K84-2985	Nachukui	L.Nariokotome
K85-2559	Koobi Fora	L. Ileret															<25	2140	360	185	<5	205	370	2550
K85-2562	Koobi Fora	BlkPum =J-7															840	1290	95	70	145	65	110	810
K85-2575	Koobi Fora	Upper Okote	14	72.65	0.16	9.37	4.84	0.14	0.01	0.15	3.52	2.19	0.51	0.21	6.18	99.68	25	1100	160	155	15	130	245	1485
K86-2876	Nachukui	Lokapetamoi															210	520	90	115	15	75	90	350
K86-2881	Nachukui	L.Nariokotome															89	2050	110	85	<5	95	230	980
K88-3232	Nachukui	Nabelete															200	780	120	95	<5	115	240	1190
K88-3233	Nachukui	Lokapetamoi															220	520	85	115	10	70	85	340
K88-3234 M2	Nachukui	Unnamed	2	74	0.34	9.73	4.62	0.18	0.01	0.24	0.61	2.05	0.33	0.08	5.42	97.46	45	2950	260	120	<5	115	265	1300
K88-3234 M1	Nachukui	Unnamed	12	73.17	0.51	8.61	5.75	0.35	0.07	0.08	0.94	2.25	0.58	0.36	4.77	97.34
K88-3237	Nachukui	Unnamed															<25	2100	255	130	5	130	275	1640
K88-3240 M1	Nachukui	Unnamed	9	74.6	0.16	10.58	3.44	0.09	0.02	0.18	2.2	3.76	0.34	0.14	4.56	99.92	35	1020	135	105	<5	90	180	1100
K88-3240 M2	Nachukui	Unnamed	6	73.64	0.3	9.48	5.29	0.2	0	0.23	1.37	3.03	0.37	0.09	5.24	99.06
K88-3242	Nachukui	Lokapetamoi	9	75.17	0.18	11.51	1.3	0.07	0.07	0.26	3.34	4.4	0.22	0.13	4.97	101.49	385	540	90	100	45	70	85	460
Supplementary Table 3 continued
Sample	Formation	Unit name	N	SiO2	TiO2	Al2O3	Fe2O3	MnO	MgO	CaO	Na2O	K2O	F	Cl	H2O	Total	Ba	Mn	Nb	Rb	Sr	Y	Zn	Zr
K88-3244	Nachukui	Nabelete															200	790	115	95	<5	115	215	1170
K88-3249	Nachukui	L.Nariokotome															130	1940	110	85	<5	100	210	990
K88-3256	Nachukui	Unnamed	17	73.22	0.33	9.82	4.49	0.16	0.01	0.25	2.46	3.79	Na	0.07	6.02	100.59	35	1260	115	100	<5	85	220	975
K88-3257	Nachukui	Unnamed	20	73.88	0.26	9.81	4.8	0.17	0.03	0.19	2.18	3.66	0.48	0.16	5.04	100.43	100	1360	180	145	<5	120	245	1515
K88-3268	Nachukui	Unnamed															230	1850	250	140	20	195	380	2120
K88-3269	Nachukui	Unnamed															170	1770	230	110	18	185	370	2000
K88-3270	Nachukui	Nabelete															190	790	120	90	<5	110	210	1170
K88-3273	Nachukui	LNariokotome															140	1930	110	85	<5	100	210	1010
K88-3285	Nachukui	LNariokotome															80	1930	115	90	<5	95	230	1000
K88-3290	Nachukui	Morutot=J-4A															195	720	150	95	<5	115	195	980
K88-3295	Nachukui	Unnamed	11	68.31	0.35	8.81	5.81	0.27	0.02	0.15	1.58	2.42	0.19	0.23	9.63	97.65	50	2340	245	115	10	125	250	1370
K88-3296	Nachukui	Lokapetamoi															235	720	90	115	15	75	95	340
K88-3297	Nachukui	Nabelete															190	770	115	95	<5	110	210	1170
K88-3304	Nachukui	Unnamed	16	73.63	0.32	9.16	5.85	0.27	0.07	0.18	0.91	2.06	0.5	0.24	7.81	100.71	25	2140	260	150	<5	135	280	1680
K88-3305	Nachukui	Unnamed	7	72.96	0.32	9.1	5.11	0.19	0.01	0.19	1.26	2.14	na	0.08	7.73	99.07	145	1460	125	90	10	95	225	970
K88-3306	Nachukui	Etirr	20	72.54	0.36	8.68	6.37	0.3	0.07	0.2	0.93	1.89	0.46	0.29	7.57	99.4	<25	2560	315	185	<5	160	315	2000
K89-3325	Nachukui	Morutot=J-4A															200	750	170	85	<5	125	225	1090
K89-3381	Nachukui	BlkPum =J-7															710	970	90	70	95	65	90	670
K89-3382	Nachukui	BlkPum =J-7															800	1100	85	65	125	65	115	690
K89-3383	Nachukui	Akait	17	70.03	0.16	10.11	2.8	0.06	0	0.18	4.21	4.16	na	na	na	91.72	35	880	125	120	5	90	190	1120
K89-3384 M1	Nachukui	Unnamed	8	75.15	0.18	10.79	3.11	0.09	0.02	0.2	2.19	4.06	0.45	0.15	2.57	98.74	65	2020	210	110	10	120	250	1320
K89-3384 M2	Nachukui	Unnamed	8	73.16	0.37	8.69	6.09	0.28	0.04	0.17	0.78	2.19	0.58	0.24	4.99	97.27
K89-3389	Nachukui	Lokapetamoi															275	600	80	110	25	70	110	330
K89-3391	Nachukui	Lokapetamoi															225	430	85	115	25	70	100	320
K93-6003	Koobi Fora	�Chabazite�	15	70.95	0.28	9.75	5.18	0.22	0.08	0.18	1.75	1.45	0.24	0.19	8.45	98.58	35	1720	205	75	15	115	265	1485
K90-4631	Nachukui	Unnamed	17	69.28	0.32	13.45	4.34	0.2	0.05	0.75	1.9	3.52	0.35	0.1	6.85	100.94	625	1540	95	75	30	65	165	780
NS-19	Koobi Fora	Morutot=J-4A	18	69.51	0.16	12.07	3.01	0.09	0	0.33	4.35	4.93	0.16	0.14	4.78	99.43	245	630	145	90	50	105	205	960
Notes: All iron expressed as Fe2O3. Water calculated as explained in text.
